# THE AMERICAN JOURNAL OF PSYCHIATRY

September 2010

Vol. 167, No. 9:1013-1144

THE AMERICAN JOURNAL OF PSYCHIATRY

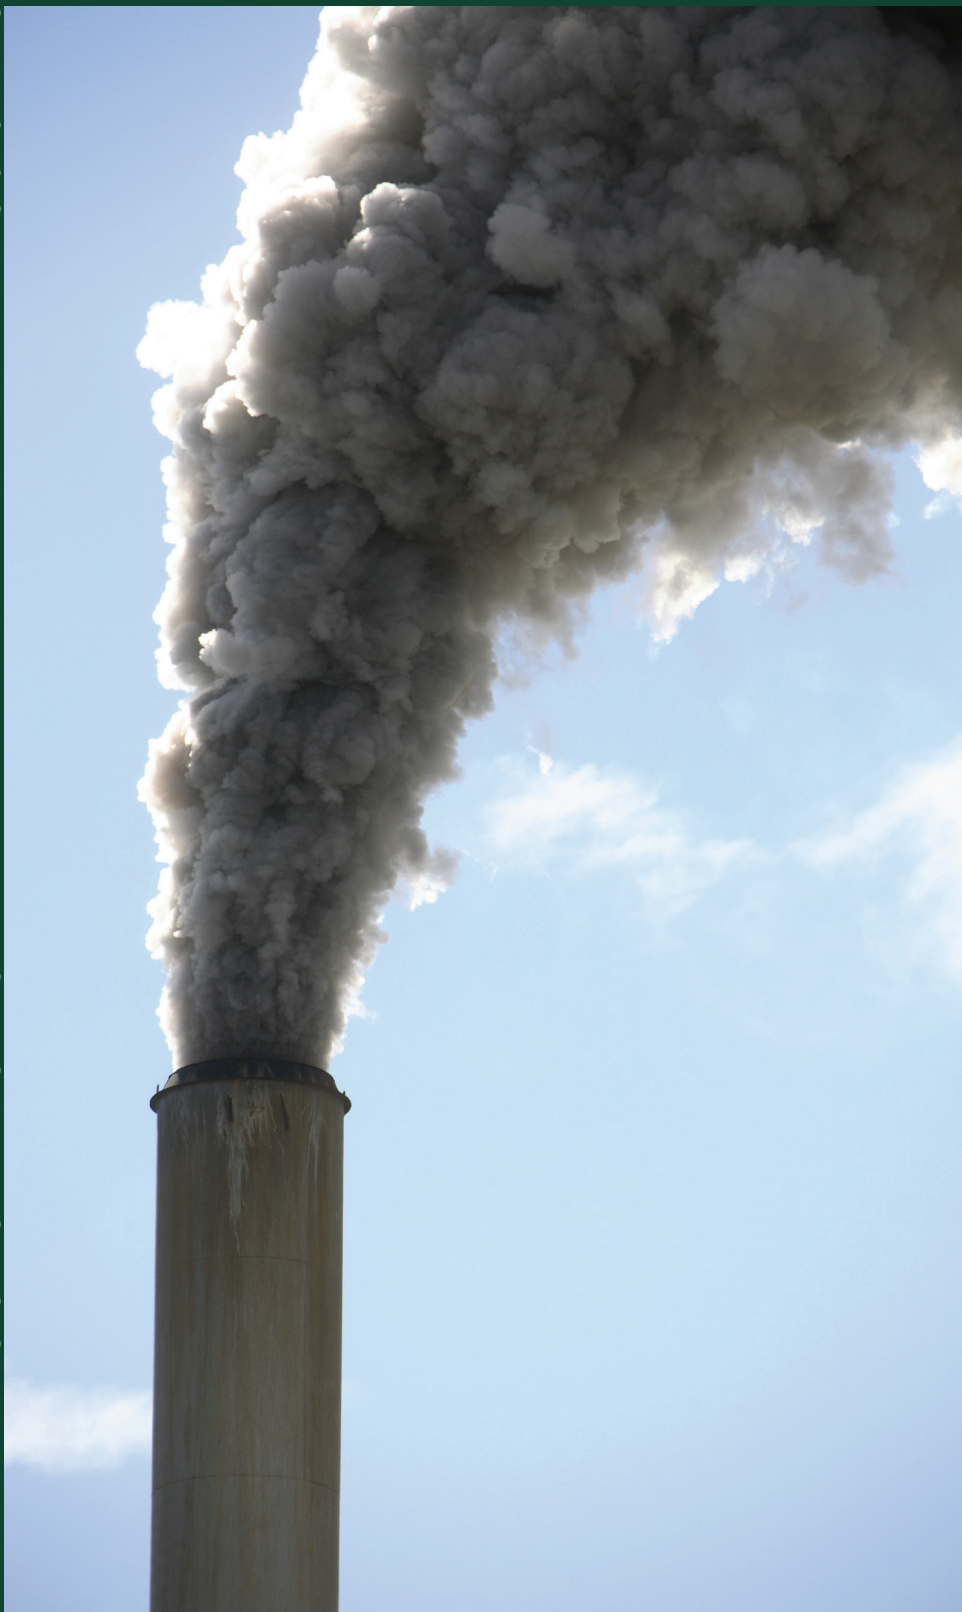

## Correlates of Anger and Hostility in Iraq and Afghanistan War Veterans

Eric B. Elbogen, Ph.D., et al. 1051

## ◀ Asthma and Suicide Mortality in Young People: A 12-Year Follow-Up Study

Chian-Jue Kuo, M.D., M.S., et al. 1092

## ◀ Ambient Particulate Matter as a Risk Factor for Suicide

Changsoo Kim, M.D., Ph.D., et al. 1100

## The Role of Histamine Degradation Gene Polymorphisms in Moderating the Effects of Food Additives on Children's ADHD Symptoms

Jim Stevenson, Ph.D., et al. 1108

Continuing Medical Education 1141

September 2010

Volume 167 • Number 9

Official Journal of the  
AMERICAN PSYCHIATRIC ASSOCIATION

[ajp.psychiatryonline.org](http://ajp.psychiatryonline.org)
